# Supplementary material for: Efficient Bi3+ to Eu3+ energy transfer and color tunable emissions in K7CaY2(B5O10)3-based phosphors
Source: Royal Society of Chemistry journal article supplement (doi:10.1039/d1dt00262g), 2021-01-01
Supplement: d1dt00262g1.pdf [file d1dt00262g1.pdf]

Electronic Supplementary Information for

Efficient Bi<sup>3+</sup> to Eu<sup>3+</sup> energy transfer and color tunable emissions in  
K<sub>7</sub>CaY<sub>2</sub>(B<sub>5</sub>O<sub>10</sub>)<sub>3</sub>-based phosphors

*Hua Chen, Yan Gao, Pengfei Jiang, Rihong Cong, \* Tao Yang\**

College of Chemistry and Chemical Engineering, Chongqing University, Chongqing  
401331, People's Republic of China.

\*E-mails: [congrihong@cqu.edu.cn](mailto:congrihong@cqu.edu.cn), [taoyang@cqu.edu.cn](mailto:taoyang@cqu.edu.cn)

**Table S1.** Selected bond distances for  $\text{K}_7\text{CaEu}_2(\text{B}_5\text{O}_{10})_3$  from Rietveld refinements

| Bond                      | Length (Å) | Bond   | Length (Å)      |
|---------------------------|------------|--------|-----------------|
| Ca1/Eu1-O4 ( $\times 4$ ) | 2.439(7)   | <M1-O> | <b>2.439(7)</b> |
| Ca1/Eu1-O4 ( $\times 2$ ) | 2.440(7)   |        |                 |
| Ca2/Eu2-O1 ( $\times 3$ ) | 2.313(7)   | <M2-O> | <b>2.354(7)</b> |
| Ca2/Eu2-O4 ( $\times 3$ ) | 2.394(7)   |        |                 |
| K1-O1 ( $\times 2$ )      | 2.790(7)   |        |                 |
| K1-O3 ( $\times 2$ )      | 2.897(1)   | <K1-O> | <b>2.928(5)</b> |
| K1-O2 ( $\times 2$ )      | 3.098(8)   |        |                 |
| K2-O5 ( $\times 2$ )      | 2.763(1)   |        |                 |
| K2-O1 ( $\times 2$ )      | 2.840(9)   | <K2-O> | <b>2.827(6)</b> |
| K2-O3 ( $\times 2$ )      | 2.879(9)   |        |                 |
| K3-O5 ( $\times 6$ )      | 2.726(9)   | <K3-O> | <b>2.726(9)</b> |
| B1-O3                     | 1.308(8)   |        |                 |
| B1-O4                     | 1.369(7)   | <B1-O> | <b>1.354(5)</b> |
| B1-O2                     | 1.385(1)   |        |                 |
| B2-O2                     | 1.276(8)   |        |                 |
| B2-O1                     | 1.303(2)   | <B2-O> | <b>1.352(4)</b> |
| B2-O5                     | 1.478(3)   |        |                 |
| B3-O3 ( $\times 2$ )      | 1.461(6)   | <B3-O> | <b>1.471(8)</b> |
| B3-O5 ( $\times 2$ )      | 1.481(9)   |        |                 |

**Table S2.** Refined cell lattice parameters from Le Bail fitting on PXRD data

| $\text{K}_7\text{Ca}(\text{Y}_{1-x}\text{Bi}_x)_2(\text{B}_5\text{O}_{10})_3$                    | $a$ (Å)    | $c$ (Å)    | $V$ (Å <sup>3</sup> ) |
|--------------------------------------------------------------------------------------------------|------------|------------|-----------------------|
| $x = 0.01$                                                                                       | 13.2565(3) | 14.9923(4) | 2281.7(1)             |
| 0.02                                                                                             | 13.2568(4) | 14.9929(5) | 2290.9(2)             |
| 0.03                                                                                             | 13.2549(3) | 14.9989(5) | 2282.1(1)             |
| 0.04                                                                                             | 13.2596(3) | 14.9950(4) | 2283.1(1)             |
| 0.05                                                                                             | 13.2608(4) | 14.9925(4) | 2283.2(1)             |
| 0.06                                                                                             | 13.2595(3) | 14.9922(3) | 2284.3(1)             |
| $\text{K}_7\text{Ca}(\text{Y}_{1-y}\text{Eu}_y)_2(\text{B}_5\text{O}_{10})_3$                    | $a$ (Å)    | $c$ (Å)    | $V$ (Å <sup>3</sup> ) |
| $y = 0.10$                                                                                       | 13.2538(3) | 14.9996(4) | 2281.9(1)             |
| 0.3                                                                                              | 13.2766(6) | 15.0061(8) | 2290.7(2)             |
| 0.5                                                                                              | 13.3048(7) | 15.0232(2) | 2303.1(3)             |
| 0.7                                                                                              | 13.3248(8) | 15.0535(1) | 2314.7(7)             |
| 0.8                                                                                              | 13.3338(7) | 15.0521(8) | 2315.9(2)             |
| 1                                                                                                | 13.3382(6) | 15.1081(9) | 2327.8(3)             |
| $\text{K}_7\text{Ca}(\text{Y}_{0.99-z}\text{Bi}_{0.01}\text{Eu}_z)_2(\text{B}_5\text{O}_{10})_3$ | $a$ (Å)    | $c$ (Å)    | $V$ (Å <sup>3</sup> ) |
| $z = 0$                                                                                          | 13.2573(4) | 14.9938(5) | 2282.2(2)             |
| 0.05                                                                                             | 13.2591(3) | 14.9997(5) | 2283.7(1)             |
| 0.15                                                                                             | 13.2697(4) | 15.0014(6) | 2287.6(2)             |
| 0.2                                                                                              | 13.2746(5) | 15.0181(6) | 2291.9(2)             |
| 0.3                                                                                              | 13.2908(5) | 15.0123(6) | 2296.6(2)             |
| 0.5                                                                                              | 13.3103(1) | 15.0238(3) | 2305.1(4)             |

|     |            |            |           |
|-----|------------|------------|-----------|
| 0.7 | 13.3251(5) | 15.0767(7) | 2318.4(9) |
| 0.9 | 13.3381(2) | 15.0949(4) | 2325.7(5) |

**Table S3.** Quantum yields for  $K_7Ca(Y_{1-x}Bi_x)_2(B_5O_{10})_3$  under the excitation of 281 nm

| $x$  | Quantum yield (%) |
|------|-------------------|
| 0.01 | 95.0              |
| 0.02 | 86.6              |
| 0.03 | 59.1              |
| 0.04 | 50.0              |
| 0.05 | 46.0              |
| 0.06 | 13.2              |

**Table S4.** CIE chromaticity coordinates for  $K_7Ca(Y_{1-y}Eu_y)_2(B_5O_{10})_3$  under 229 or 392 nm excitation

| $y$ | $\lambda_{ex} = 229 \text{ nm}$ | $\lambda_{ex} = 392 \text{ nm}$ |
|-----|---------------------------------|---------------------------------|
| 0.1 | (0.640, 0.360)                  | (0.637, 0.363)                  |
| 0.3 | (0.641, 0.359)                  | (0.640, 0.360)                  |
| 0.5 | (0.641, 0.359)                  | (0.640, 0.359)                  |
| 0.7 | (0.641, 0.359)                  | (0.641, 0.359)                  |
| 0.8 | (0.637, 0.362)                  | (0.641, 0.359)                  |
| 1   | (0.642, 0.358)                  | (0.642, 0.358)                  |

**Table S5.** Quantum yields for  $\text{K}_7\text{Ca}(\text{Y}_{1-y}\text{Eu}_y)_2(\text{B}_5\text{O}_{10})_3$  under the excitation of 392 nm

| $y$  | Quantum yield (%) |
|------|-------------------|
| 0.10 | 68.90             |
| 0.30 | 95.00             |
| 0.50 | 87.59             |
| 0.70 | 82.35             |
| 0.80 | 80.73             |
| 1    | 76.43             |

**Table S6.** CIE chromaticity coordinates for  $\text{K}_7\text{Ca}(\text{Y}_{0.99-z}\text{Bi}_{0.01}\text{Eu}_z)_2(\text{B}_5\text{O}_{10})_3$  under 281 nm excitation

| $z$  | CIE chromaticity coordinate |
|------|-----------------------------|
| 0    | (0.168, 0.008)              |
| 0.05 | (0.438, 0.204)              |
| 0.15 | (0.542, 0.287)              |
| 0.2  | (0.583, 0.318)              |
| 0.3  | (0.605, 0.335)              |
| 0.5  | (0.619, 0.348)              |
| 0.7  | (0.623, 0.347)              |
| 0.9  | (0.623, 0.349)              |

**Table S7.** Quantum yields for  $\text{K}_7\text{Ca}(\text{Y}_{0.99-z}\text{Bi}_{0.01}\text{Eu}_z)_2(\text{B}_5\text{O}_{10})_3$  under the excitation of 281 nm

| $z$ | Quantum yield (%) |
|-----|-------------------|
|-----|-------------------|

|      |       |
|------|-------|
| 0.05 | 95.14 |
| 0.15 | 99.79 |
| 0.20 | 98.02 |
| 0.30 | 98.24 |
| 0.50 | 98.71 |
| 0.70 | 91.71 |
| 0.90 | 80.80 |

---

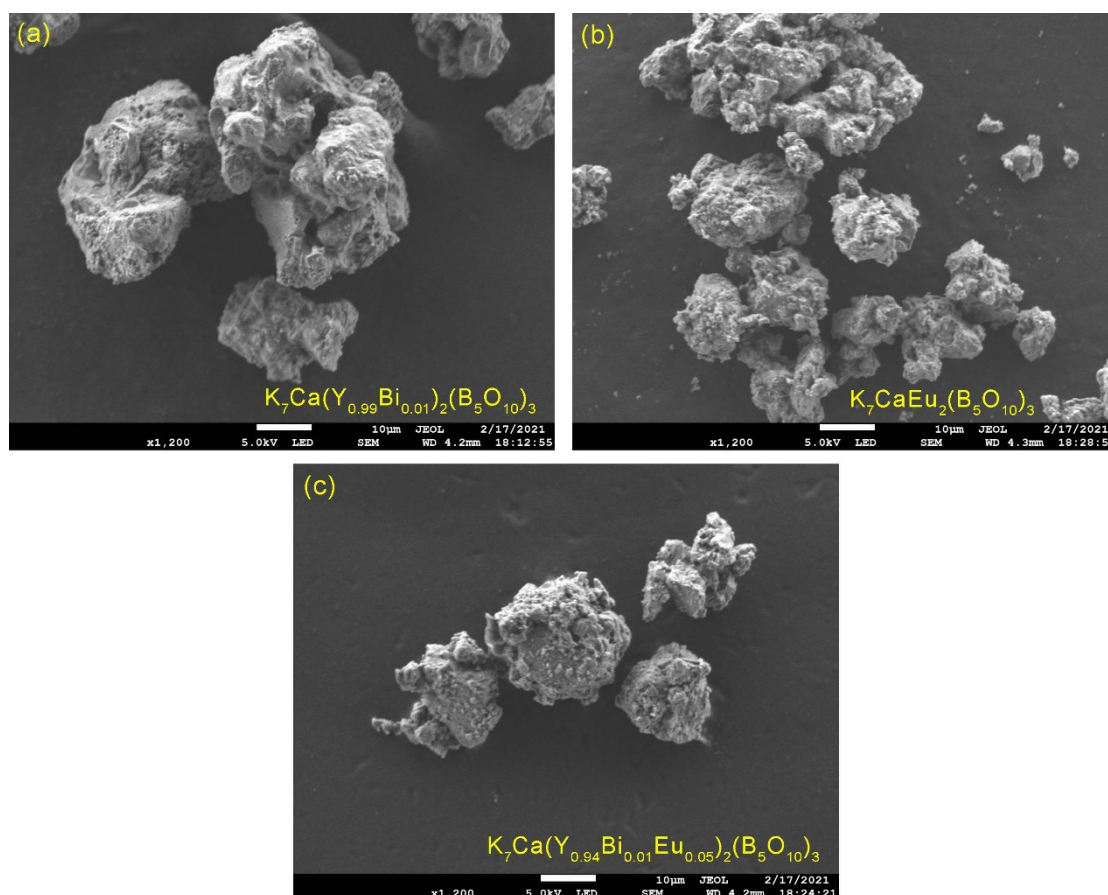

**Fig. S1.** SEM images for representative samples (a)  $K_7Ca(Y_{0.99}Bi_{0.01})_2(B_5O_{10})_3$ , (b)  $K_7CaEu_2(B_5O_{10})_3$ , and (c)  $K_7Ca(Y_{0.94}Bi_{0.01}Eu_{0.05})_2(B_5O_{10})_3$ .

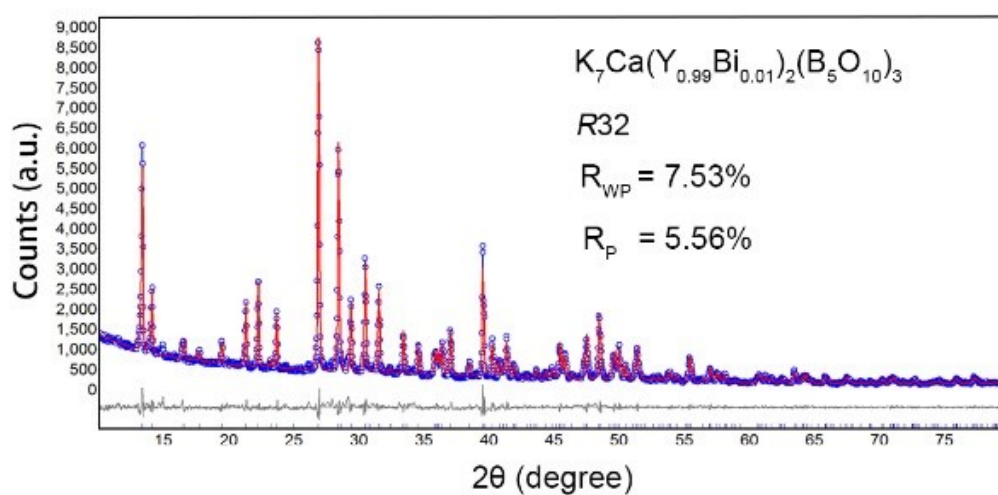

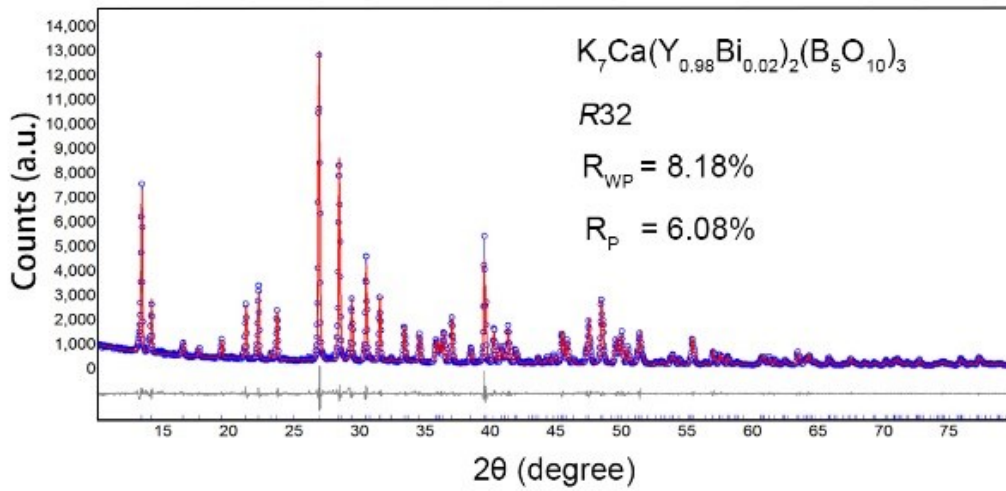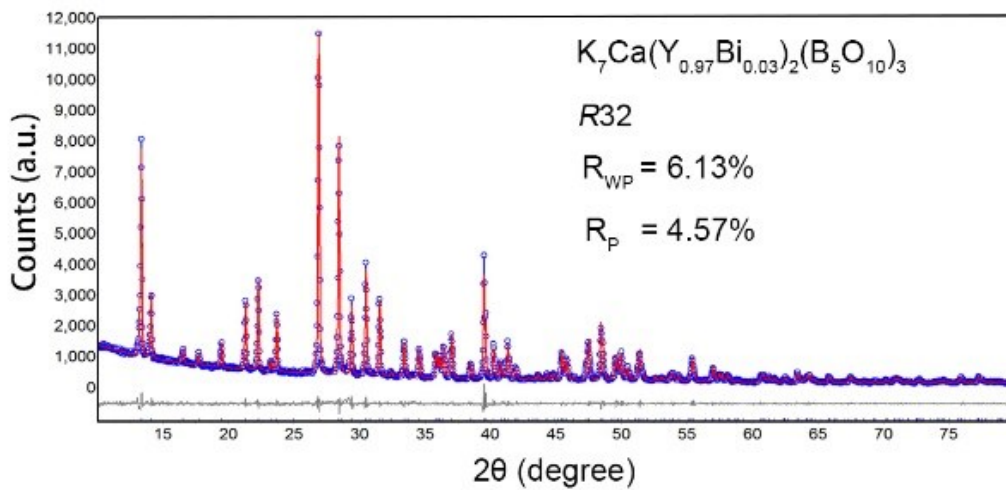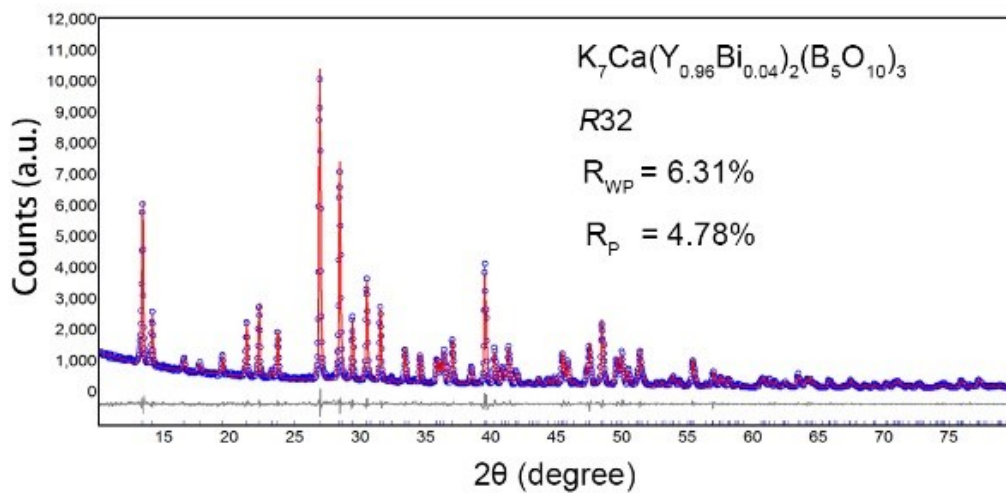



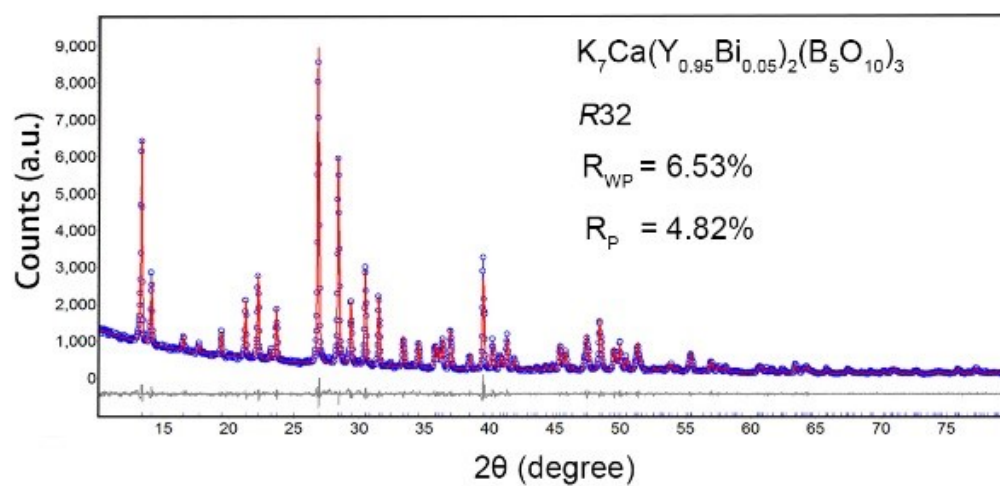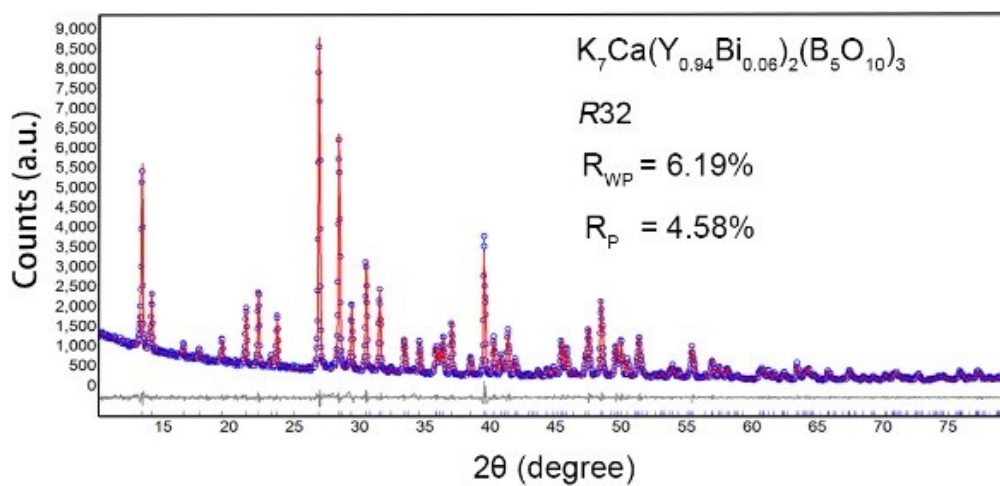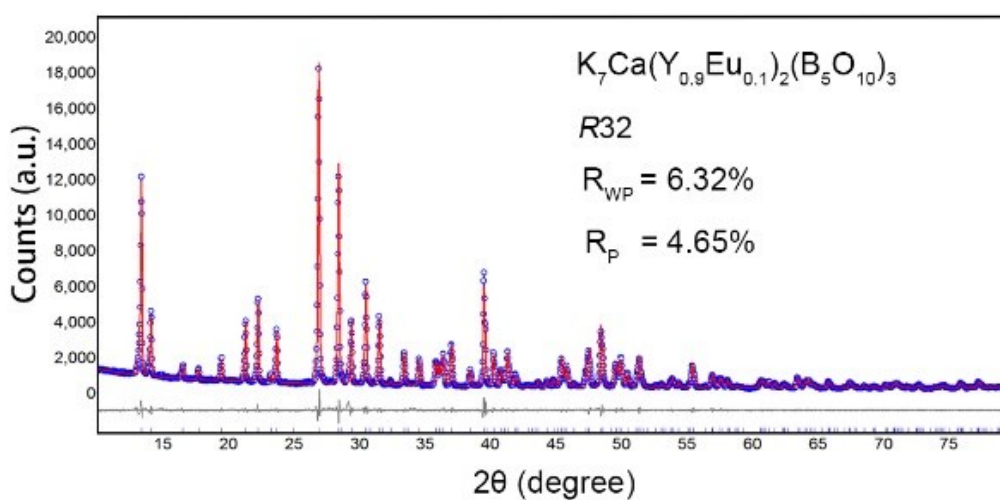

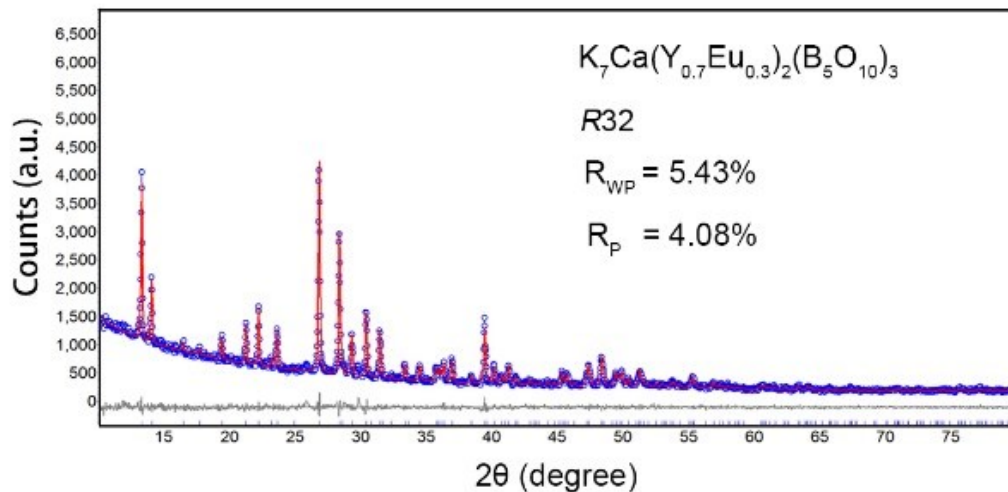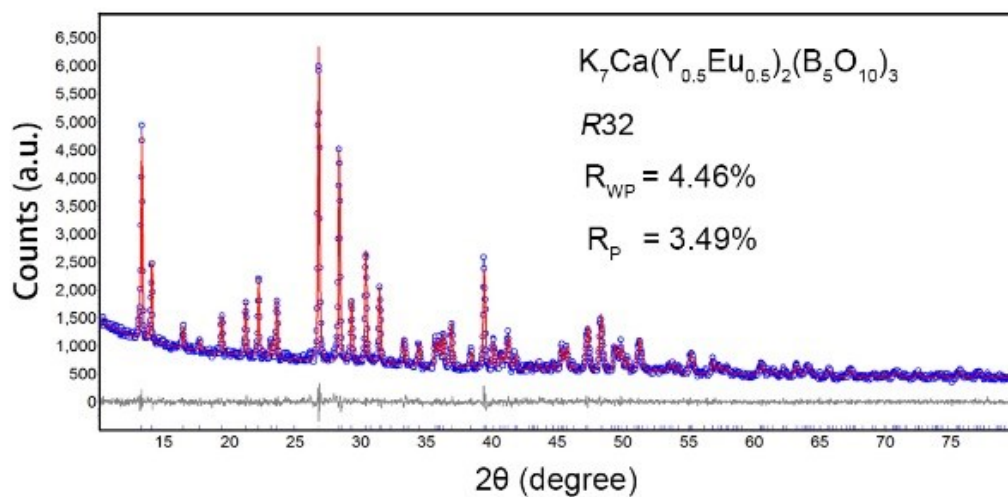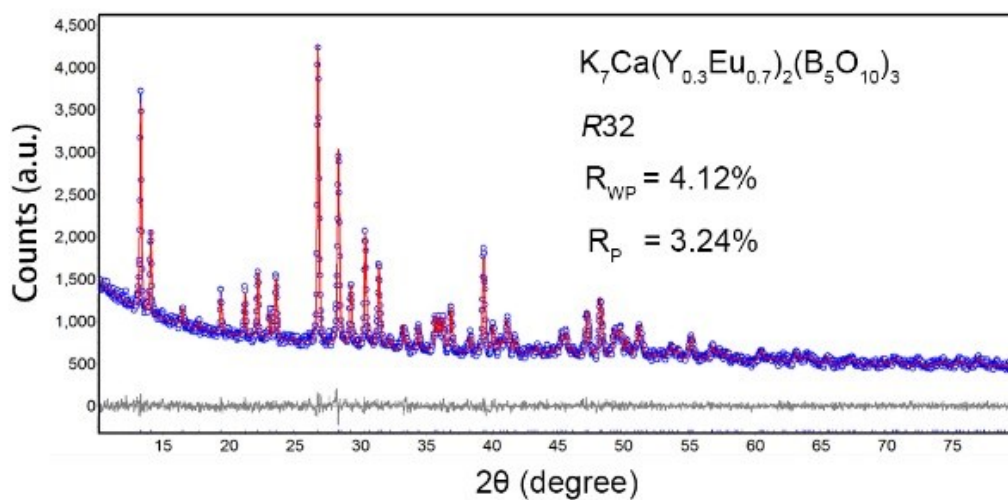

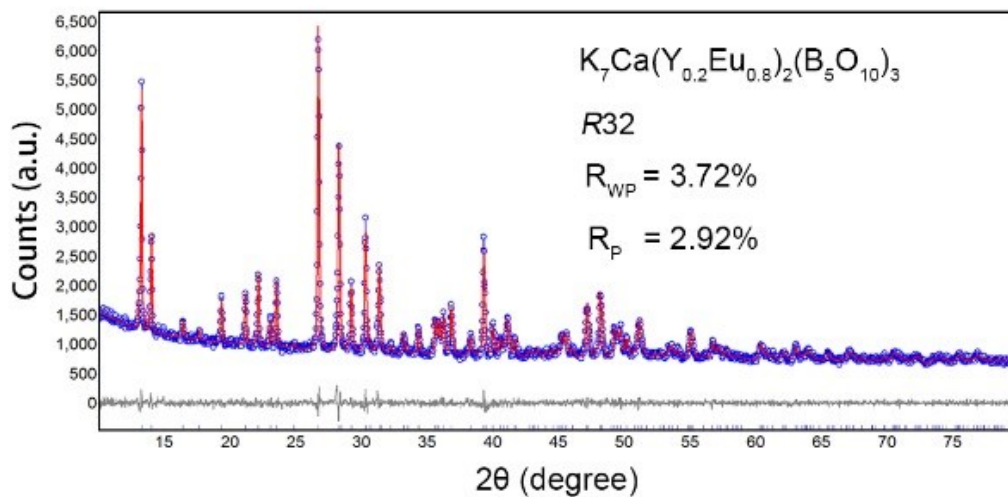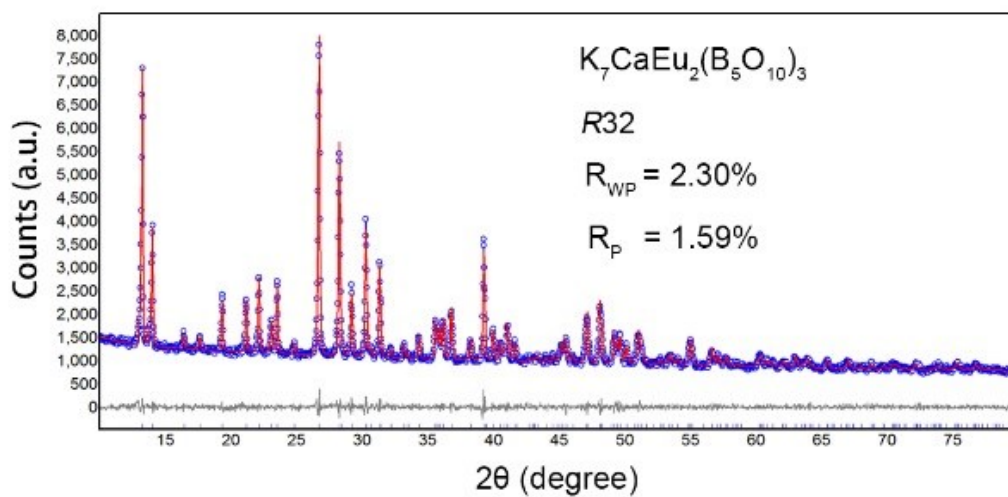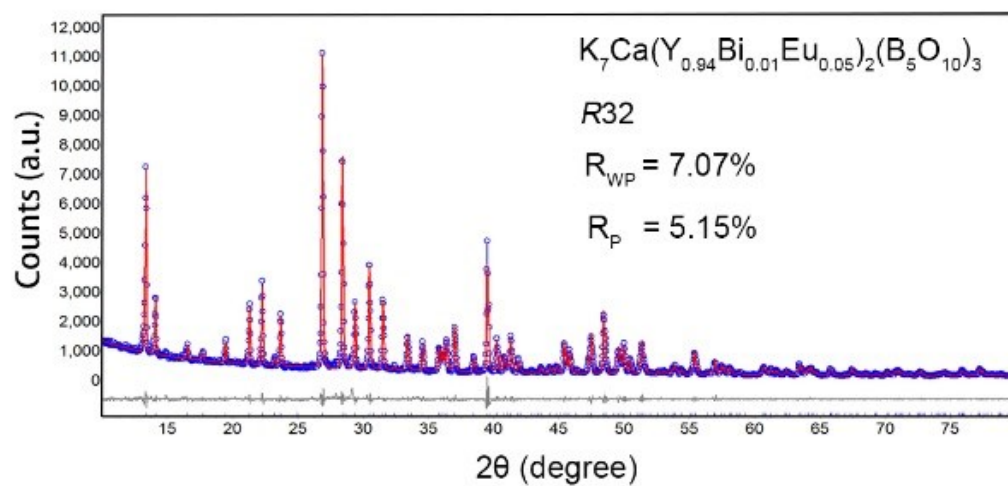

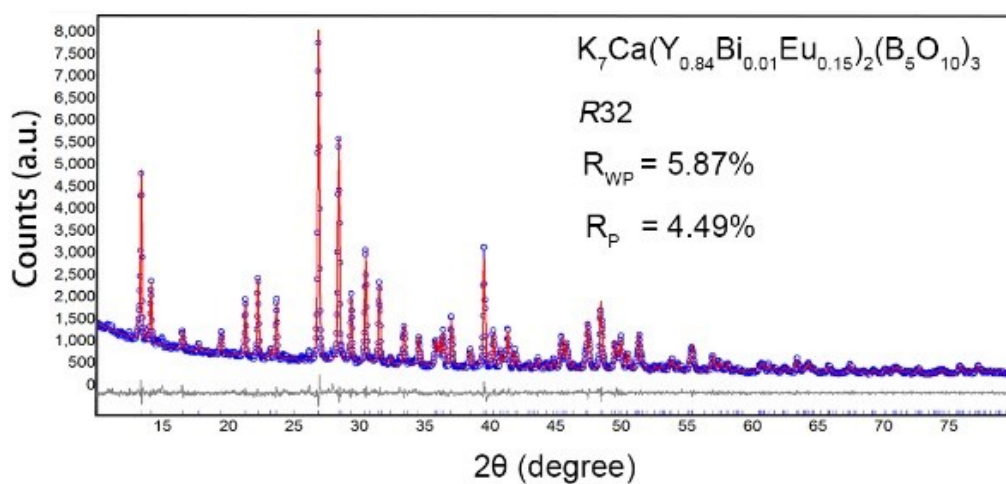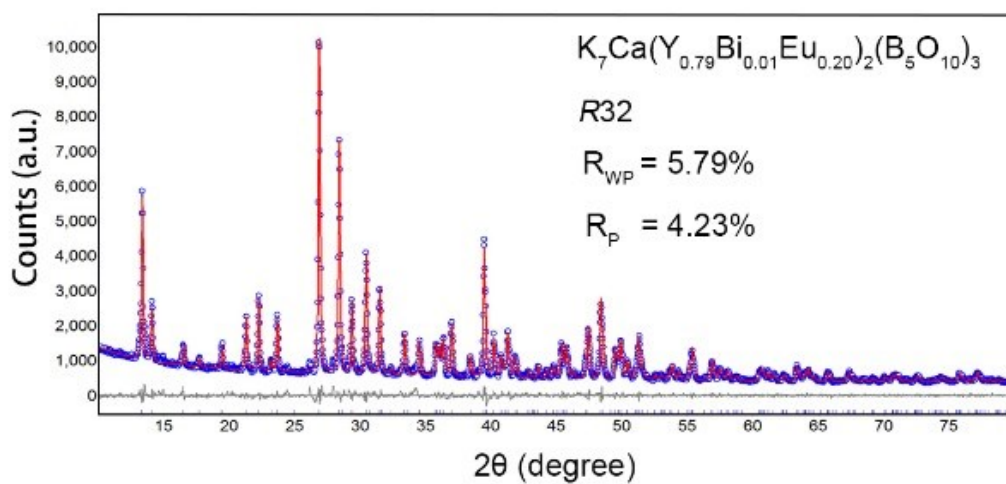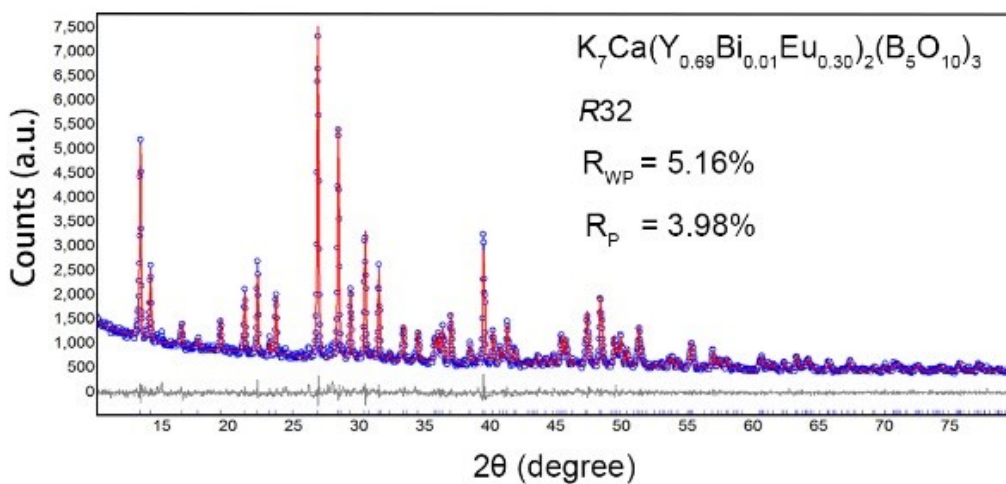

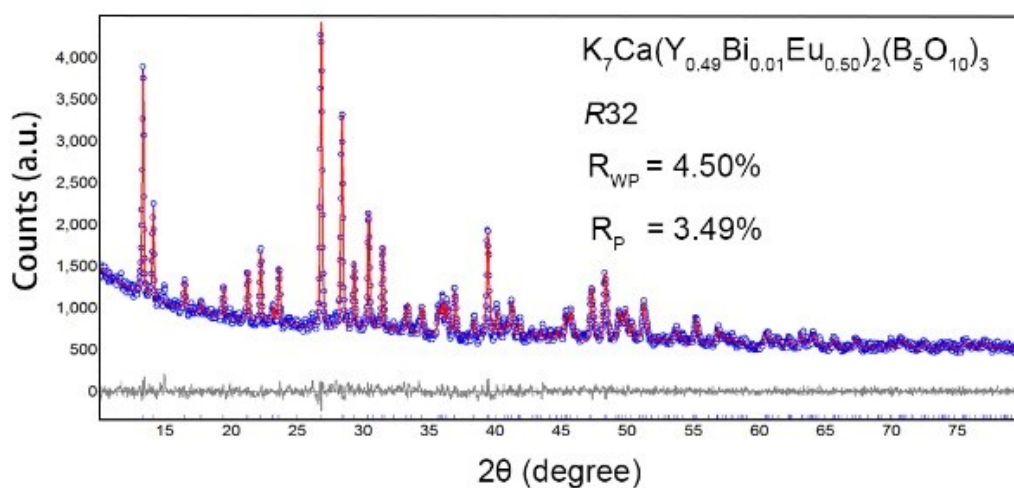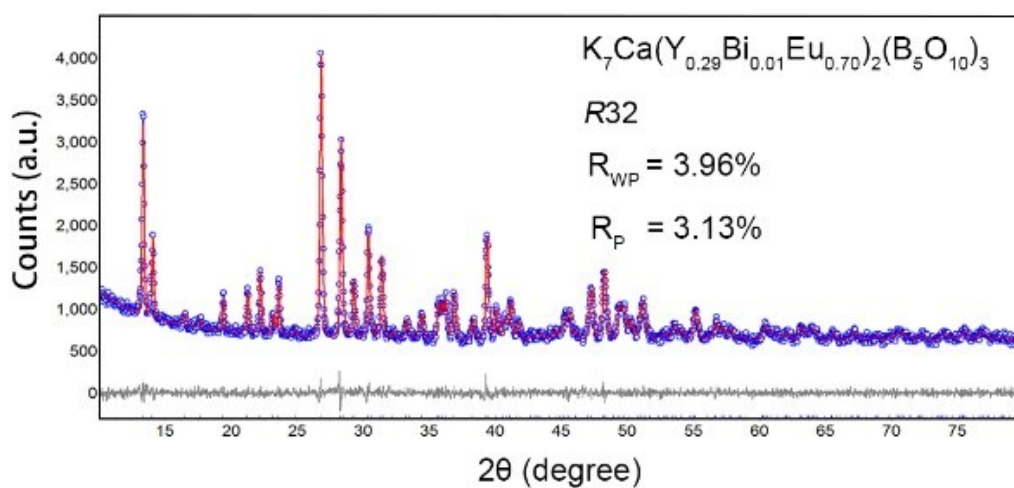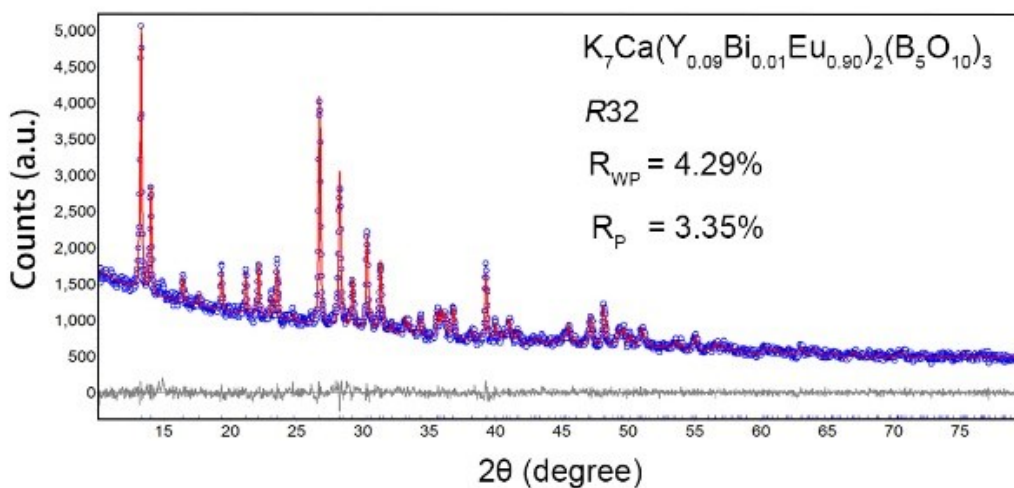

**Fig. S2.** Final convergences of Le Bail fitting for  $K_7Ca(Y_{1-x}Bi_x)_2(B_5O_{10})_3$  ( $0.01 \leq x \leq 0.06$ ),  $K_7Ca(Y_{1-y}Eu_y)_2(B_5O_{10})_3$  ( $0.10 \leq y \leq 1$ ) and  $K_7Ca(Y_{0.99-z}Bi_{0.01}Eu_z)_2(B_5O_{10})_3$  ( $0.05 \leq z \leq 0.90$ ). Blue circles, red and gray lines represent the observed, simulated data and the difference between them,

respectively.

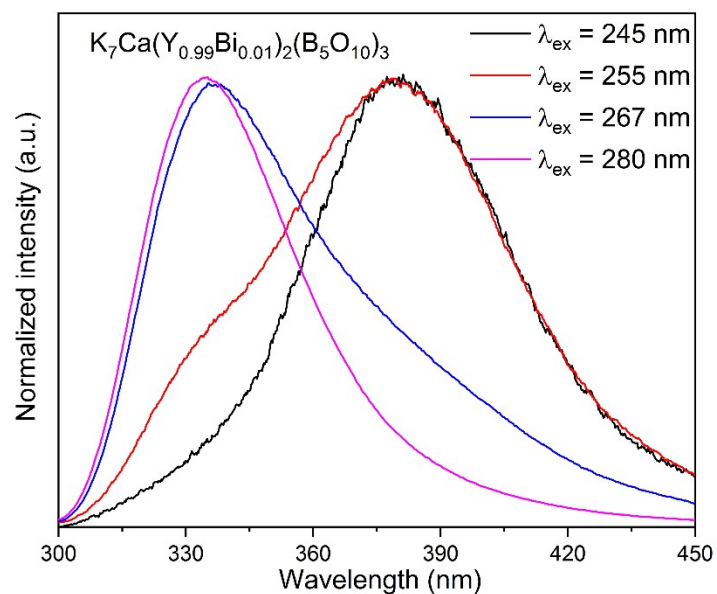

**Fig. S3.** Normalized emission spectra for  $K_7Ca(Y_{0.99}Bi_{0.01})_2(B_5O_{10})_3$  under different excitation wavelengths.

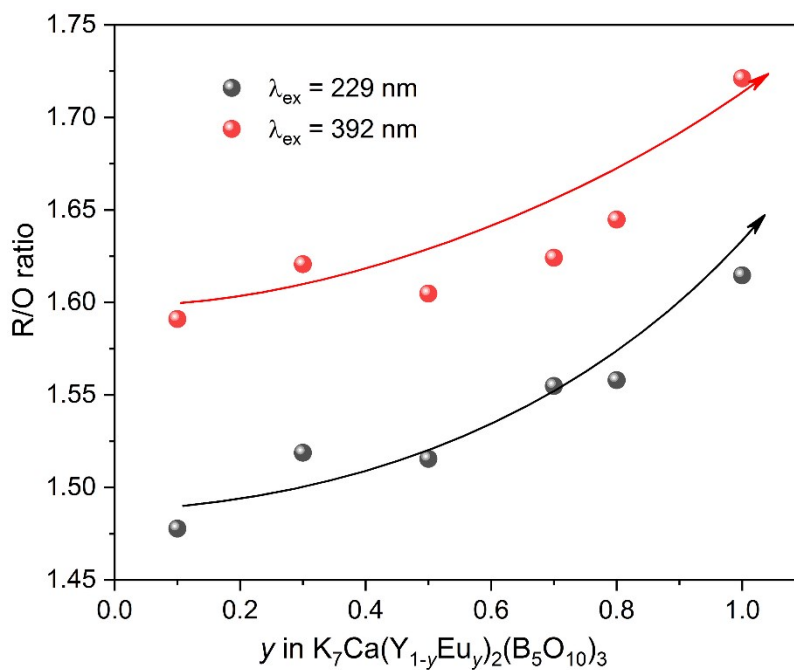

**Fig. S4.** Estimated R/O ratios for  $K_7Ca(Y_{1-y}Eu_y)_2(B_5O_{10})_3$  ( $0.10 \leq y \leq 1$ ) under CT or the strongest  $f-f$  excitations.

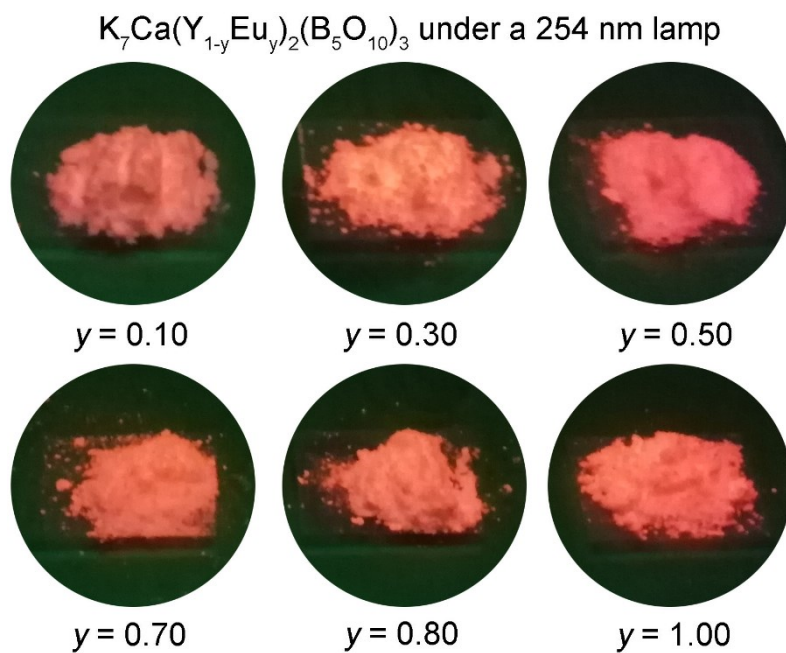

**Fig. S5.** Photographs for  $K_7Ca(Y_{1-y}Eu_y)_2(B_5O_{10})_3$  ( $0.10 \leq y \leq 1$ ) under a 254 nm UV lamp.

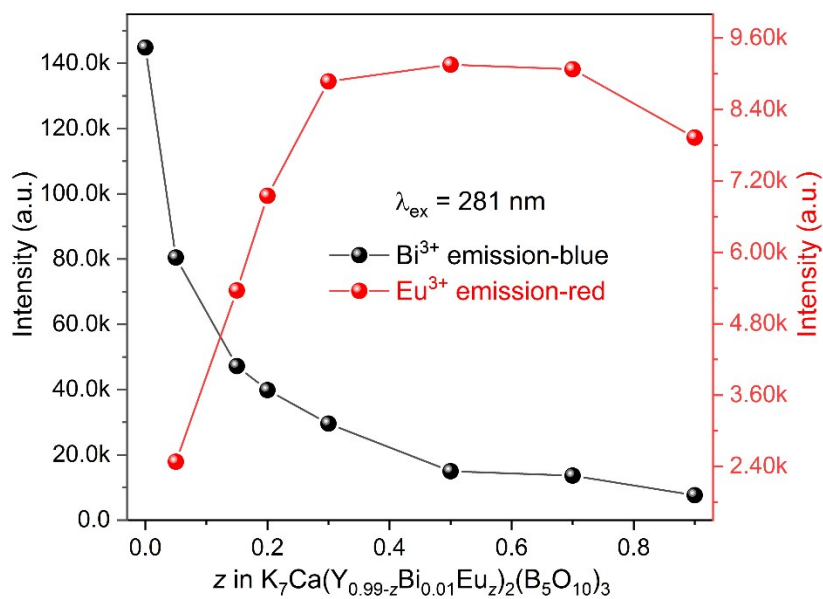

**Fig. S6.** Corresponding intensity for  $Bi^{3+}$  (blue) and  $Eu^{3+}$  (red) emissions for  $K_7Ca(Y_{0.99-z}Bi_{0.01}Eu_z)_2(B_5O_{10})_3$  ( $0 \leq z \leq 0.9$ ) under the excitation of 281 nm.

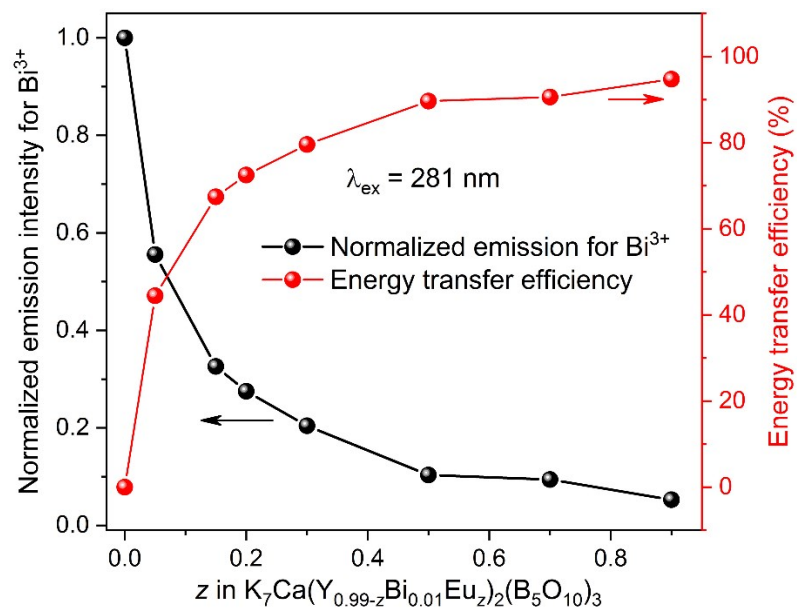

**Fig. S7.** Normalized  $Bi^{3+}$  emission intensity and the so-calculated energy transfer efficiency for  $K_7Ca(Y_{0.99-z}Bi_{0.01}Eu_z)_2(B_5O_{10})_3$  ( $0 \leq z \leq 0.9$ ) under 281 nm excitation.
